# Supplementary material for: 24-Norursodeoxycholic acid reshapes immunometabolism in CD8+ T cells and alleviates hepatic inflammation
Source: PubMed Central journal article supplement — J Hepatol. 2021 Nov;75(5):1164–76. doi: 10.1016/j.jhep.2021.06.036 (PMC8522806; doi:10.1016/j.jhep.2021.06.036), 2021-11
Supplement: mmc2.pdf [file mmc2.pdf]

## Journal of Hepatology

### CTAT methods

Tables for a “Complete, Transparent, Accurate and Timely account” (CTAT) are now mandatory for all revised submissions. The aim is to enhance the reproducibility of methods.

- Only include the parts relevant to your study
- Refer to the CTAT in the main text as ‘Supplementary CTAT Table’
- Do not add subheadings
- Add as many rows as needed to include all information
- Only include one item per row

**If the CTAT form is not relevant to your study, please outline the reasons why:**

All antibody and primer sequence information can be found in supplementary material and methods table 1 and table 2 respectively.

#### 1.1 Antibodies

| Name | Citation | Supplier | Cat no. | Clone no. |
|------|----------|----------|---------|-----------|
|      |          |          |         |           |

#### 1.2 Cell lines

| Name | Citation | Supplier | Cat no. | Passage no. | Authentication test method |
|------|----------|----------|---------|-------------|----------------------------|
|      |          |          |         |             |                            |

#### 1.3 Organisms

| Name                             | Citation       | Supplier             | Strain   | Sex  | Age     | Overall n number |
|----------------------------------|----------------|----------------------|----------|------|---------|------------------|
| C57BL/6J                         |                | Janvier labs, France | C57BL/6J | male | 8 weeks | 90               |
| <i>Mdr2(Abcb4)<sup>-/-</sup></i> | PMID: 16472600 | In house bred        | FVBN     | male | 8 weeks | 32               |

#### 1.4 Sequence based reagents

| Name | Sequence | Supplier |
|------|----------|----------|
|      |          |          |

#### 1.5 Biological samples

| Description | Source | Identifier |
|-------------|--------|------------|
|             |        |            |

#### 1.6 Deposited data

| Name of repository | Identifier | Link |
|--------------------|------------|------|
|                    |            |      |

## 1.7 Software

| Software name                | Manufacturer      | Version |
|------------------------------|-------------------|---------|
| GraphPad Prism               | La Jolla, CA, USA | v.7.0   |
| FlowJo                       | Tree Star         | 10.7.1  |
| Proteome Discoverer platform | ThermoFisher      | 2.2.0.  |

## 1.8 Other (e.g. drugs, proteins, vectors etc.)

|           |                 |  |
|-----------|-----------------|--|
| Rapamycin | Cell signaling  |  |
| Ly294002  | Cell signaling  |  |
| NorUDCA   | Dr. Falk Pharma |  |
| UDCA      | Cayman          |  |

## 1.9 Please provide the details of the corresponding methods author for the manuscript:

Professor, Dr. Michael Trauner (shared correspondence, leading contact)  
Hans Popper Laboratory of Molecular Hepatology, Division of Gastroenterology and Hepatology, Department of Internal Medicine III, Medical University of Vienna, Vienna, Austria.

Telephone: +43 (0)1 40400 - 47440

Fax: +43 (0)1 40400 - 47350

E-Mail: michael.trauner@meduniwien.ac.at

Dr. Nicole Boucheron (shared correspondence)

Institute of Immunology, Center for Pathophysiology, Infectiology and Immunology, Medical University of Vienna, Vienna, Austria.

Tel.: +43 (0)1 40160 - 33293

Fax: +43 (0)1 40160 - 933293

Email: nicole.boucheron@meduniwien.ac.at

## 2.0 Please confirm for randomised controlled trials all versions of the clinical protocol are included in the submission. These will be published online as supplementary information.

Not applicable
